# Supplementary material
Source: PubMed Central journal article supplement (PMC6594883)
Supplement: NIHMS1524088-supplement-Supplemental_Digital_Content.pdf [file NIHMS1524088-supplement-Supplemental_Digital_Content.pdf]

## Supplemental Digital Appendix 1 Rochester Participatory Decision-Making Scale (RPAD) Rating Guide as Annotated for and Used in the Patient Engagement Project Study<sup>a</sup>

| # | Question                                                                                                                                                                                                                                                                    | Answers                                                                                      |                                                                                                                                   |                                                                                                                                             |
|---|-----------------------------------------------------------------------------------------------------------------------------------------------------------------------------------------------------------------------------------------------------------------------------|----------------------------------------------------------------------------------------------|-----------------------------------------------------------------------------------------------------------------------------------|---------------------------------------------------------------------------------------------------------------------------------------------|
| 1 | Did the physician/team <b>explain</b> the clinical issue or nature of the decision?<br><br><i>*Focus on the nature of the explanation—if this was cursory, hurried or confusing, then score ½. If this was clear, score a 1.</i>                                            | 0 = no evidence                                                                              | ½ = gives a cursory, hurried, unclear, rushed explanation or long confusing lecture                                               | 1 = clearly explains his/her view of the medical/ clinical problem                                                                          |
| 2 | Discussion of the uncertainties associated with the situation <b>OR alternatives</b> .<br><br><i>*Score for discussion of “alternatives” in addition to uncertainties.</i>                                                                                                  | 0 = no evidence                                                                              | ½ = acknowledges uncertainties <i>or alternatives</i> but does not explain thoroughly or only does with active patient prompting. | 1 = thoroughly explains uncertainties <i>or alternatives</i> in the problem or treatment.                                                   |
| 3 | Clarification of agreement<br><br><i>*½: passive assent = head nodding, or simple vocalizations (“ok” “sure” “yeah”)<br/>*1: “active” examples: Do you agree with this plan?”<br/>“Are you on board with this?”</i>                                                         | 0 = no evidence                                                                              | ½ = patient expressed passive assent                                                                                              | 1 = actively asks for patient agreement and tries to obtain a commitment from the patient to the treatment plan.                            |
| 4 | Examine barriers to follow-through with the treatment plan<br><br><i>*1/2: patient volunteers concerns without prompting by MD<br/>*1: examples: “What concerns do you have?” “Do you foresee any issues impacting your ability to follow through with this plan?”</i>      | 0 = no evidence                                                                              | ½ = <b>patient discloses</b> concerns or problems with following through with treatment                                           | 1 = <b>physician actively examines</b> patient’s concerns or problems with following through with treatment plan                            |
| 5 | Physician/team gives patient opportunity to ask questions AND checks patient’s understanding of the treatment plan.<br><br><i>*To score a 1, the MD must specifically ask if the patient understands their problems or treatment plan.</i>                                  | 0 = no opportunity for the patient to ask questions                                          | ½ = patient has opportunity to ask questions                                                                                      | 1 = physician/team asks patient for their understanding of problems or plans                                                                |
| 6 | Physician’s/team’s medical language matches patient’s level of understanding.<br><br><i>*Watching the patient’s facial expressions and body language can assist here. (For instance, medical jargon is OK if the patient is a physician.)</i>                               | 0 = clear mismatch between the technicality of the physician’s/team’s and patient’s language | ½ = level of technicality or detail of the physician’s/team’s and patient’s language matches most of the time                     | 1 = level of technicality or detail of the physician’s/team’s and patient’s language clearly matches                                        |
| 7 | Physician/team asks, “ <b>Any questions?</b> ”<br><br><i>*To score this ½ or 1, the MD must say the word “question.” (e.g., “what questions do you have?”)<br/>*To score this a 1, discussion must follow this question</i>                                                 | 0 = no evidence                                                                              | ½ = yes, but no discussion ensues                                                                                                 | 1 = yes, and <b>physician/team engages in a discussion</b> with the patient about the question                                              |
| 8 | Physician/team asks open-ended questions.<br><br><i>*OK for question in 7 to “count twice,” although there is a possibility that a provider will be scored for #8 but not for #7.<br/>*To score this a 1, discussion must ensue</i>                                         | 0 = no evidence                                                                              | ½ = yes, but no discussion ensues                                                                                                 | 1 = yes, and <b>physician/team engages in a discussion</b> with the patient about the question                                              |
| 9 | Physician/team <b>checks his/her understanding</b> of the patient’s point of view.<br><br><i>*To score this as ½ or 1, the physician should essential use “teach back.” (e.g., “so if I understand you correctly, you feel comfortable trying the insulin injections?”)</i> | 0 = no evidence                                                                              | ½ = yes, but no discussion ensues                                                                                                 | 1 = yes, and <b>physician/team engages in a discussion with patient about the physician’s/team’s perceptions of patient’s point of view</b> |

<sup>a</sup>Annotated RPAD, adapted from Shields et al<sup>23</sup> for use as a coding guide by PEP Study observers. Asterisks and italicized/bolded font draw an observer’s attention to key details.
